# Supplementary material for: Cluster Dynamics-based Parameterization for Sulfuric Acid-Dimethylamine Nucleation: Comparison and Selection through Box- and Three-Dimensional- Modeling
Source: Copernicus journal article supplement (doi:10.5194/egusphere-2024-642), 2024-04-08
Supplement: Supplementary file 1 [file egusphere-2024-642-supplement.pdf]

1 **SUPPORTING INFORMATION**

2 **Cluster Dynamics-based Parameterization for Sulfuric Acid-Dimethylamine**  
3 **Nucleation: Comparison and Selection through Box- and Three-Dimensional-**  
4 **Modeling**

5  
6 Jiewen Shen<sup>1,2</sup>, Bin Zhao<sup>1,2</sup>, Shuxiao Wang<sup>1,2,\*</sup>, An Ning<sup>3</sup>, Yuyang Li<sup>2</sup>, Runlong Cai<sup>4</sup>,  
7 Da Gao<sup>1,2</sup>, Biwu Chu<sup>5,6</sup>, Yang Gao<sup>7</sup>, Manish Shrivastava<sup>8</sup>, Jingkun Jiang<sup>2</sup>, Xiuhui  
8 Zhang<sup>3</sup>, Hong He<sup>5,6</sup>

9  
10 <sup>1</sup>*State Key Joint Laboratory of Environment Simulation and Pollution Control, School*  
11 *of Environment, Tsinghua University, Beijing, 100084, China*

12 <sup>2</sup>*State Environmental Protection Key Laboratory of Sources and Control of Air*  
13 *Pollution Complex, Beijing, 100084, China*

14 <sup>3</sup>*Key Laboratory of Cluster Science, Ministry of Education of China, School of*  
15 *Chemistry and Chemical Engineering, Beijing Institute of Technology, Beijing, 100081,*  
16 *China*

17 <sup>4</sup>*Shanghai Key Laboratory of Atmospheric Particle Pollution and Prevention (LAP<sup>3</sup>),*  
18 *Department of Environmental Science & Engineering, Fudan University, Shanghai,*  
19 *200438, China*

20 <sup>5</sup>*State Key Joint Laboratory of Environment Simulation and Pollution Control,*  
21 *Research Center for Eco-Environmental Sciences, Chinese Academy of Sciences,*  
22 *Beijing 100085, China*

23 <sup>6</sup>*College of Resources and Environment, University of Chinese Academy of Sciences,*  
24 *Beijing 100049, China*

25 <sup>7</sup>*Key Laboratory of Marine Environment and Ecology, Ministry of Education, Ocean*  
26 *University of China, Qingdao 266100, China*

27 <sup>8</sup>*Pacific Northwest National Laboratory, Richland, Washington, USA*

28  
29 \* Correspondence to: Shuxiao Wang (shxwang@tsinghua.edu.cn)

30  
31 *Totally 11 Figures and 2 Tables*  
32

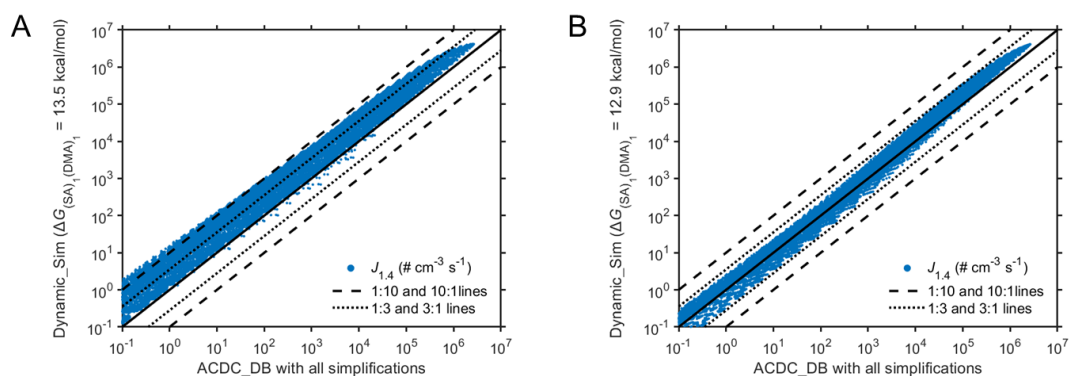

34

35

36 **Figure S1.** Comparison of  $J_{1,4}$  predictions between ACDC\_DB with all simplifications  
 37 and Dynamic\_Sim with different  $\Delta G$  for initial  $(SA)_1(DMA)_1$  cluster. A:  $\Delta G = 13.5$   
 38 kcal/mol; B:  $\Delta G = 12.9$  kcal/mol (Ning et al. 2024). Solid dots represent simulated  $J_{1,4}$   
 39 values, solid lines indicate a 1:1 line, dotted lines correspond to 1:3 and 3:1 lines, and  
 40 dashed lines represent 1:10 and 10:1 lines.

41

42

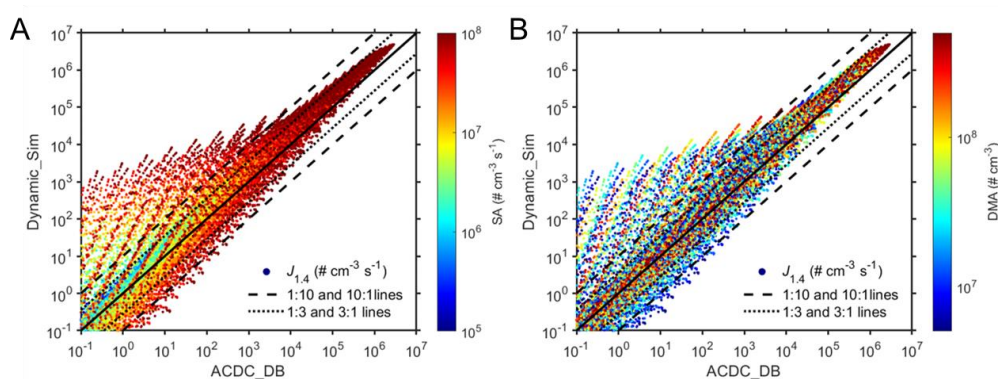

43

44 **Figure S2.** Comparison of  $J_{1,4}$  predictions between ACDC\_DB and Dynamic\_Sim  
 45 correlated with  $[SA]$  variation (A) and  $[DMA]$  variation (B). Solid dots represent  
 46 simulated  $J_{1,4}$  values, solid lines indicate a 1:1 line, dotted lines correspond to 1:3 and  
 47 3:1 lines, and dashed lines represent 1:10 and 10:1 lines.

48

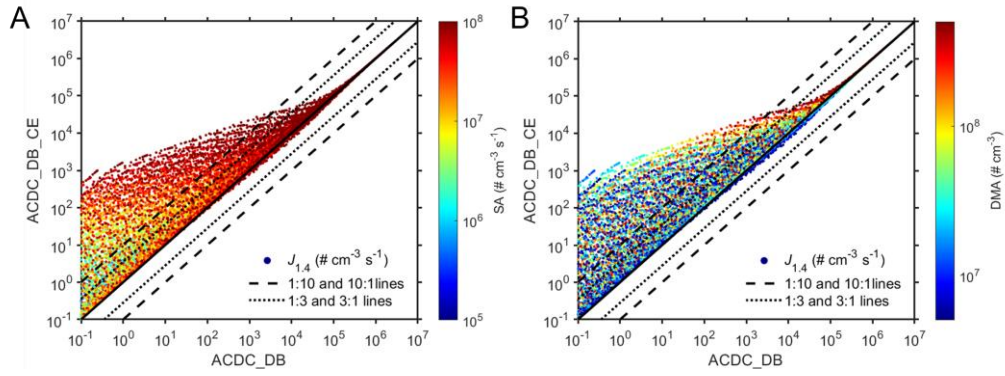

49

50 **Figure S3.** Same as Figure S2 but for ACDC\_DB\_CE.

51

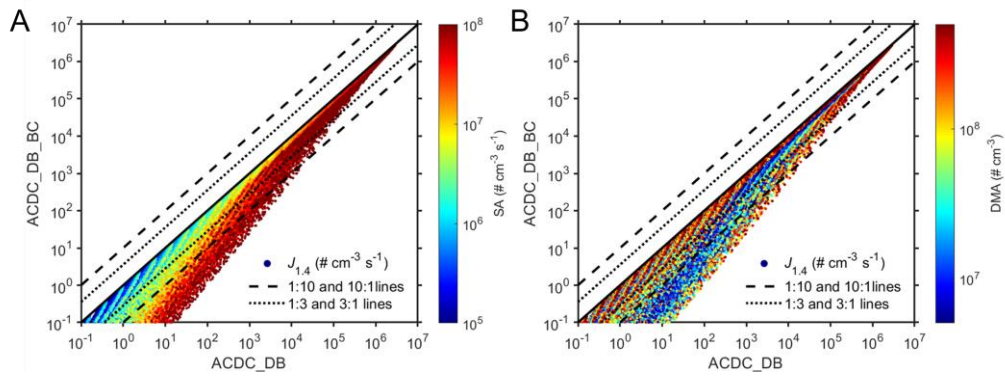

52

53 **Figure S4.** Same as Figure S2 but for ACDC\_DB\_BC.

54

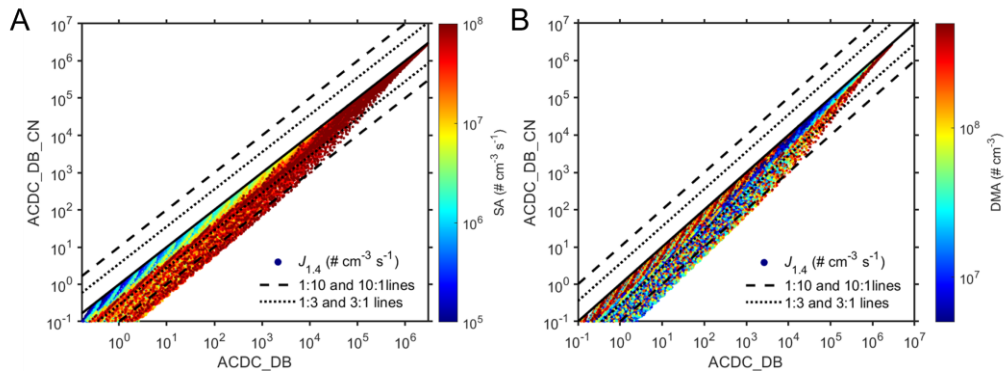

55

56 **Figure S5.** Same as Figure S2 but for ACDC\_DB\_CN.

57

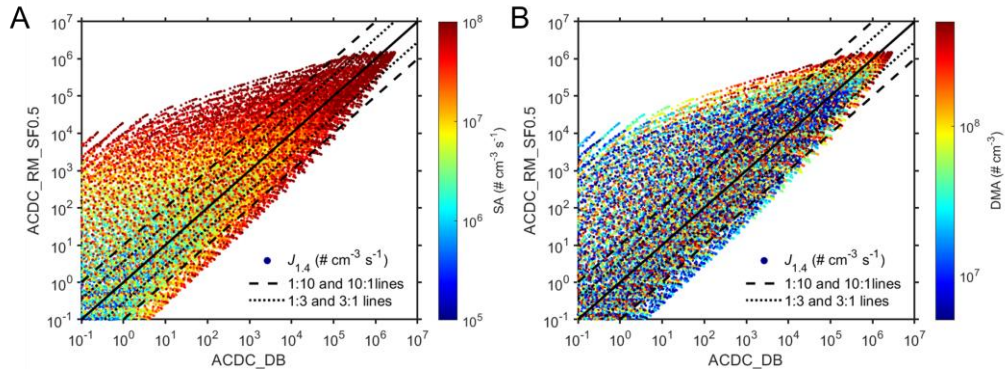

58

59 **Figure S6.** Same as Figure S2 but for ACDC\_RM\_SF0.5.

60

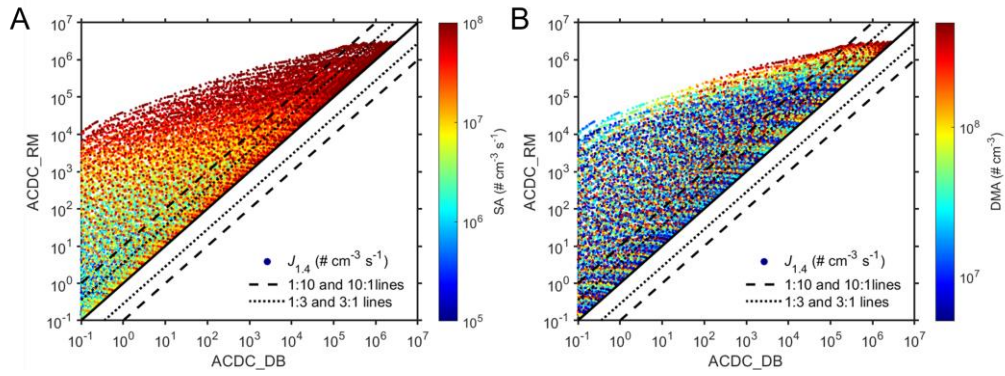

61

62 **Figure S7.** Same as Figure S2 but for ACDC\_RM.

63

64

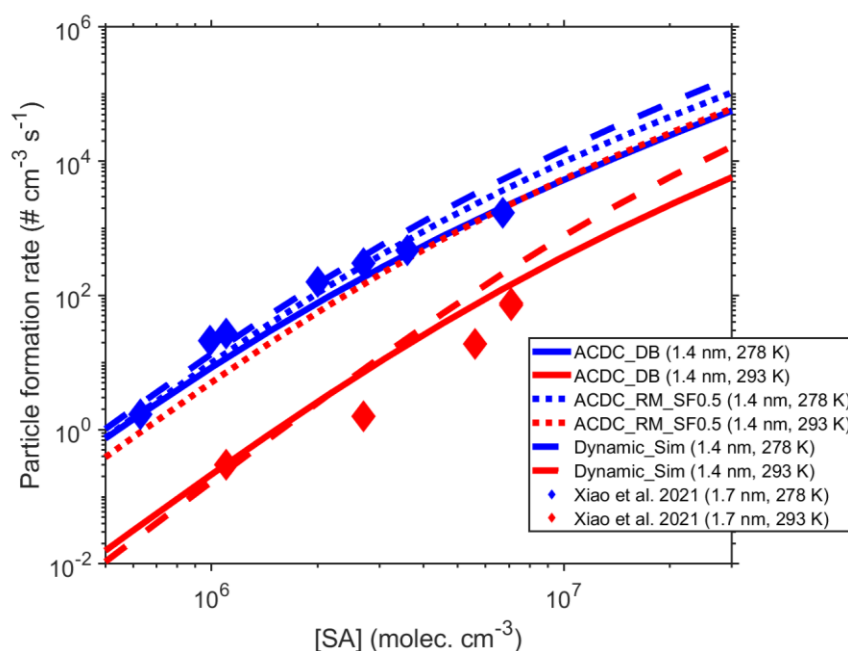

66

67 **Figure S8.** Comparison of modeled particle formation rates with measurements from  
 68 CLOUD chamber experiments conducted by Xiao et al. 2021. Blue lines or diamonds  
 69 represent particle formation rates at 278 K, while red ones represent those at 293 K;  
 70 solid, dotted, and dashed lines denote the simulated results of ACDC\_DB,  
 71 ACDC\_RM\_SF0.5, and Dynamic\_Sim, respectively. The simulations were conducted  
 72 following the experimental conditions of Xiao et al. 2021, with specific conditions  
 73 provided in their Table S1 and Table S2. It is noteworthy that Xiao et al. 2021 reported  
 74 particle formation rates at 1.7 nm, whereas our simulations are at 1.4 nm. This  
 75 discrepancy may lead to a slight overestimation of the simulated particle formation rates  
 76 for simulations compared to the experiments. However, in the experiments, ~1 ppbv  
 77 NH<sub>3</sub> was involved besides DMA during nucleation, which might enhance nucleation  
 78 rates somewhat even through DMA is the dominant enhancing agent for SA-driven  
 79 nucleation. Therefore, the two effects could partly offset each other, allowing for a  
 80 direct comparison of particle formation rates between simulations and measurements.

81

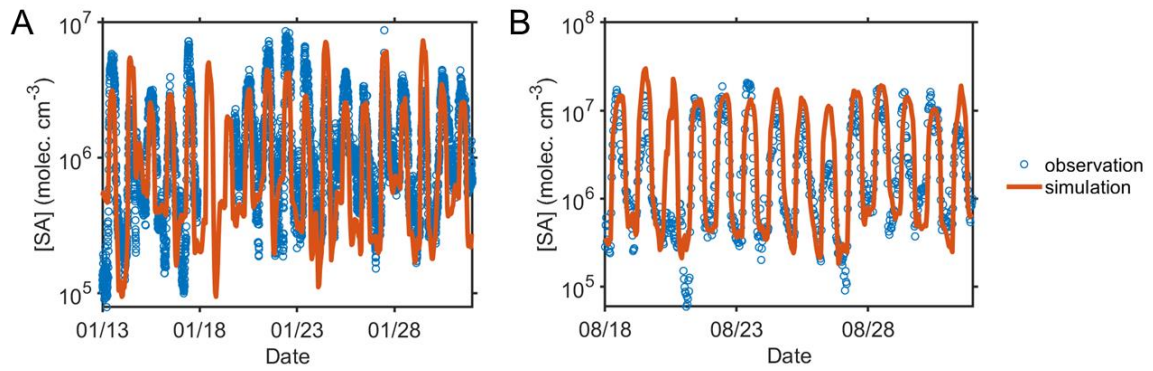

82

83 **Figure S9.** Comparison of simulated and observed SA concentrations. A for January  
 84 and B for August 2019.

85

86

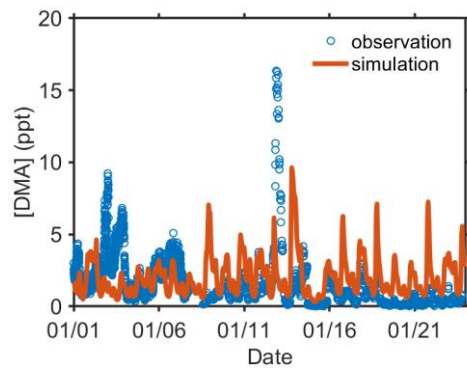

87

88 **Figure S10.** Comparison of simulated and observed DMA concentrations in January  
 89 2019. Only data for winter month (January 2019) is available.

90

91

92

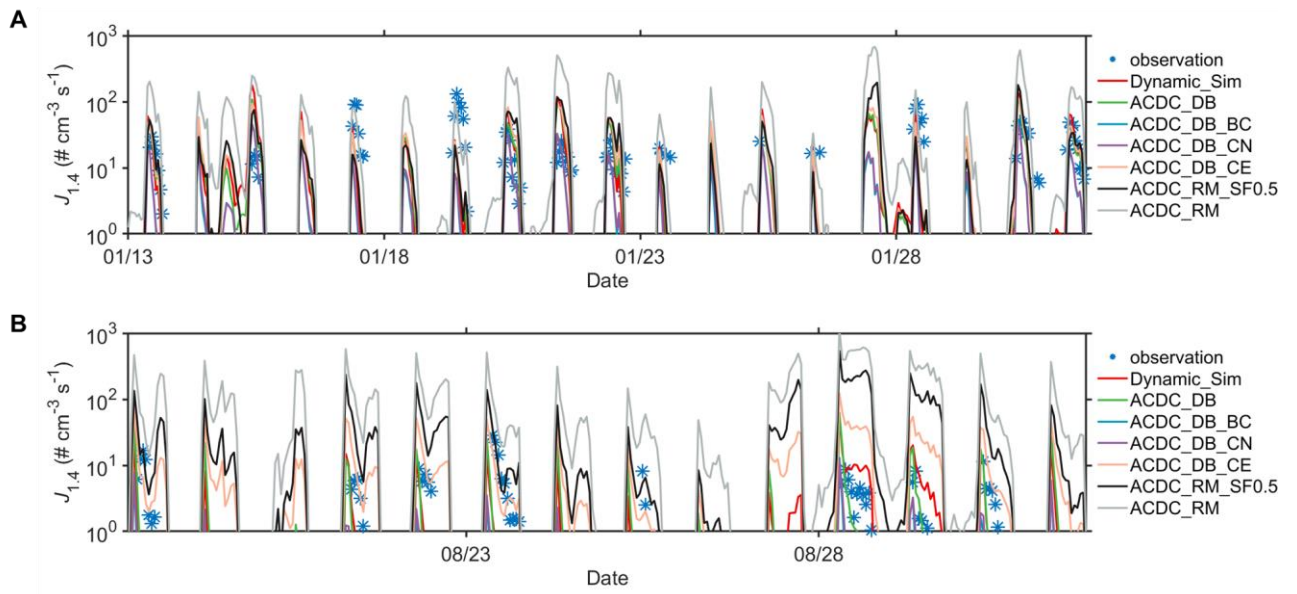

93  
 94 **Figure S11.** Comparison of simulated particle formation rates with those derived from  
 95 field measurements during (A) January 13, 2019, to January 31, 2019, and (B) August  
 96 18, 2019, to August 31, 2019, in Beijing.

97  
 98  
 99  
 100

101 **Table S1.** The ranges, total numbers and values at each point for the input parameters  
 102 in deriving look-up tables

|                                | Range                                 | Number of points | Values at each point                                   |
|--------------------------------|---------------------------------------|------------------|--------------------------------------------------------|
| $T$ (K)                        | 250 – 320                             | 15               | $250 + 5 \times i, i = 1, 15$                          |
| CS ( $s^{-1}$ )                | $5 \times 10^{-4} - 5 \times 10^{-1}$ | 16               | $5 \times 10^{-4} \times 10^{0.2 \times i}, i = 1, 16$ |
| [SA] ( $\# \text{ cm}^{-3}$ )  | $1 \times 10^5 - 1 \times 10^8$       | 16               | $1 \times 10^5 \times 10^{0.2 \times i}, l = 1, 16$    |
| [DMA] ( $\# \text{ cm}^{-3}$ ) | $5 \times 10^6 - 1 \times 10^8$       | 11               | $5 \times 10^6 \times 10^{0.2 \times i}, i = 1, 11$    |

103

104

105

106

107 **Table S2.** Comparison of simulated and observed concentrations of the nucleating  
 108 precursors.

| Precursor                         | Time period               | Site    | Simulation         | Observation        | Bias               | NMB     |
|-----------------------------------|---------------------------|---------|--------------------|--------------------|--------------------|---------|
| <b>SA</b><br>( $\#/\text{cm}^3$ ) | 2019.01.13-<br>2019.01.31 | Beijing | $1.35 \times 10^6$ | $1.47 \times 10^6$ | $1.20 \times 10^5$ | -10.80% |
|                                   | 2019.08.18-<br>2019.08.31 |         | $5.74 \times 10^6$ | $3.51 \times 10^6$ | $2.23 \times 10^6$ | 14.32%  |
| <b>DMA</b><br>(pptv)              | 2019.01.01-<br>2019.01.31 | Beijing | 1.96               | 1.98               | -0.02              | -10.96% |

109

110



111 **REFERENCES**

112 Xiao, M., Hoyle, C. R., Dada, L., Stolzenburg, D., Kürten, A., Wang, M.,  
113 Lamkaddam, H., Garmash, O., Mentler, B., Molteni, U., Baccharini, A., Simon,  
114 M., He, X.-C., Lehtipalo, K., Ahonen, L. R., Baalbaki, R., Bauer, P. S., Beck,  
115 L., Bell, D., Bianchi, F., Brilke, S., Chen, D., Chiu, R., Dias, A., Duplissy, J.,  
116 Finkenzeller, H., Gordon, H., Hofbauer, V., Kim, C., Koenig, T. K.,  
117 Lampilahti, J., Lee, C. P., Li, Z., Mai, H., Makhmutov, V., Manninen, H. E.,  
118 Marten, R., Mathot, S., Mauldin, R. L., Nie, W., Onnela, A., Partoll, E., Petäjä,  
119 T., Pfeifer, J., Pospisilova, V., Quéléver, L. L. J., Rissanen, M., Schobesberger,  
120 S., Schuchmann, S., Stozhkov, Y., Tauber, C., Tham, Y. J., Tomé, A., Vazquez-  
121 Pufleau, M., Wagner, A. C., Wagner, R., Wang, Y., Weitz, L., Wimmer, D., Wu,  
122 Y., Yan, C., Ye, P., Ye, Q., Zha, Q., Zhou, X., Amorim, A., Carslaw, K.,  
123 Curtius, J., Hansel, A., Volkamer, R., Winkler, P. M., Flagan, R. C., Kulmala,  
124 M., Worsnop, D. R., Kirkby, J., Donahue, N. M., Baltensperger, U., El  
125 Haddad, I., and Dommen, J.: The driving factors of new particle formation and  
126 growth in the polluted boundary layer, *Atmospheric Chemistry and Physics*,  
127 21, 14275-14291, 10.5194/acp-21-14275-2021, 2021.

128

129
